# Supplementary material for: miR-542-5p Attenuates Fibroblast Activation by Targeting Integrin α6 in Silica-Induced Pulmonary Fibrosis
Source: MDPI journal article supplement (doi:10.3390/ijms19123717), 2018-11-22
Supplement: s1 [file s1]

## Supplemental Experimental Data

**Table S1.** The densitometric analysis of Western blot in Figure 1C.

|               | Day 1     | Day 7     | Day 14    | Day 28    | Day 56    |
|---------------|-----------|-----------|-----------|-----------|-----------|
| Fibronectin   | 4516.104  | 8090.933  | 8574.104  | 11290.347 | 10710.347 |
| Collagen (I)  | 7599.426  | 8420.447  | 15103.903 | 20771.539 | 21191.711 |
| Vimentin      | 12117.711 | 14066.61  | 19110.51  | 21063.095 | 25347.61  |
| $\alpha$ -SMA | 7520.347  | 15573.104 | 10338.024 | 14350.711 | 13158.125 |
| GAPDH         | 22381.175 | 22948.075 | 23686.761 | 22508.882 | 23291.175 |
| Fibronectin   | 4674.225  | 8019.054  | 10884.882 | 10929.761 | 10160.811 |
| Collagen (I)  | 15614.569 | 20319.397 | 21009.711 | 23386.196 | 30047.61  |
| Vimentin      | 12976.225 | 17463.468 | 20261.054 | 25682.882 | 24055.054 |
| $\alpha$ -SMA | 13378.276 | 17883.024 | 26177.711 | 21551.782 | 23186.681 |
| GAPDH         | 30250.317 | 26751.882 | 24531.953 | 21029.418 | 24797.66  |
| Fibronectin   | 4248.376  | 5228.548  | 6178.912  | 7925.376  | 6732.255  |
| Collagen (I)  | 9599.426  | 10420.447 | 15103.903 | 20771.539 | 21191.711 |
| Vimentin      | 10811.326 | 11013.933 | 13532.953 | 17381.56  | 21224.903 |
| $\alpha$ -SMA | 18929.61  | 17215.075 | 23288.853 | 21651.953 | 26860.338 |
| GAPDH         | 35607.539 | 33749.782 | 30200.418 | 26949.196 | 29613.045 |

**Table S2.** The densitometric analysis of Western blot in Figure 2D.

|               | Control   | Silica    | Silica+miR-NC | Silica+miR-542-5p |
|---------------|-----------|-----------|---------------|-------------------|
| Fibronectin   | 10760.468 | 20778.731 | 21032.61      | 9207.447          |
| Collagen (I)  | 10598.196 | 20479.045 | 19064.874     | 6708.154          |
| Vimentin      | 8801.296  | 19879.803 | 17374.146     | 9583.853          |
| $\alpha$ -SMA | 7131.054  | 17515.024 | 16665.631     | 8070.811          |
| GAPDH         | 36102.56  | 33205.782 | 29140.974     | 32179.368         |
| Fibronectin   | 10970.69  | 20250.217 | 22556.681     | 10132.589         |
| Collagen (I)  | 6966.154  | 12823.903 | 15073.903     | 5090.79           |
| Vimentin      | 8836.054  | 20804.024 | 19012.61      | 8302.832          |
| $\alpha$ -SMA | 6356.669  | 15615.51  | 13600.823     | 6294.184          |
| GAPDH         | 19133.205 | 20224.711 | 18977.296     | 20250.468         |
| Fibronectin   | 12386.903 | 23956.196 | 23323.104     | 13853.983         |
| Collagen (I)  | 9141.062  | 17385.832 | 17676.752     | 8586.66           |
| Vimentin      | 9815.66   | 20338.731 | 20513.903     | 10265.095         |
| $\alpha$ -SMA | 13327.539 | 24303.731 | 22725.731     | 13541.539         |
| GAPDH         | 23700.225 | 16995.175 | 16988.175     | 14781.447         |

**Table S3.** The densitometric analysis of Western blot in Figure 3D.

|               | Control   | Silica    | Silica+miR-NC | Silica+miR-542-5p |
|---------------|-----------|-----------|---------------|-------------------|
| Fibronectin   | 13156.225 | 23432.125 | 28795.974     | 12543.861         |
| Collagen (I)  | 12316.024 | 30640.238 | 34925.167     | 15922.075         |
| Vimentin      | 6301.489  | 14033.995 | 12709.581     | 5456.619          |
| $\alpha$ -SMA | 12547.832 | 22617.167 | 19130.51      | 7207.539          |
| GAPDH         | 30660.539 | 21629.518 | 19244.317     | 23227.359         |
| Fibronectin   | 9759.447  | 19472.853 | 19022.803     | 10891.56          |
| Collagen (I)  | 11628.581 | 25828.602 | 25603.359     | 10403.368         |
| Vimentin      | 17700.539 | 26325.489 | 28842.116     | 16589.539         |
| $\alpha$ -SMA | 9097.196  | 19438.095 | 19735.581     | 10749.288         |
| GAPDH         | 21128.74  | 22674.761 | 23260.761     | 22134.518         |
| Fibronectin   | 9998.447  | 25651.267 | 23986.075     | 14182.418         |
| Collagen (I)  | 15781.146 | 31573.53  | 28553.581     | 8952.69           |
| Vimentin      | 20461.974 | 27618.56  | 27360.853     | 16581.518         |
| $\alpha$ -SMA | 5488.184  | 14836.116 | 13794.338     | 6696.953          |
| GAPDH         | 19541.861 | 19250.397 | 19237.347     | 19103.246         |

**Table S4.** The densitometric analysis of Western blot in Figure 4A (left).

|                | 0 ng/mL   | 1 ng/mL   | 2 ng/mL   | 5 ng/mL   |
|----------------|-----------|-----------|-----------|-----------|
| TGF- $\beta$ 1 |           |           |           |           |
| Fibronectin    | 7209.782  | 13691.51  | 16130.631 | 17659.56  |
| Collagen (I)   | 11316.225 | 15538.276 | 15044.74  | 19337.69  |
| Vimentin       | 19013.489 | 27812.075 | 31232.66  | 35399.267 |
| $\alpha$ -SMA  | 2959.598  | 6826.518  | 8512.983  | 9933.246  |
| GAPDH          | 12146.338 | 14718.853 | 14694.196 | 14741.61  |
| Fibronectin    | 6155.598  | 11272.66  | 13995.711 | 13986.459 |
| Collagen (I)   | 11352.167 | 12605.903 | 15925.61  | 19016.803 |
| Vimentin       | 24245.368 | 33590.953 | 37075.439 | 31800.489 |
| $\alpha$ -SMA  | 4330.447  | 8787.276  | 12802.569 | 11415.711 |
| GAPDH          | 17640.175 | 15635.004 | 16248.711 | 14974.004 |
| Fibronectin    | 7760.874  | 24390.966 | 22484.35  | 23853.2   |
| Collagen (I)   | 8537.832  | 10769.811 | 10390.276 | 18220.468 |
| Vimentin       | 6558.749  | 8708.489  | 13599.811 | 19057.539 |
| $\alpha$ -SMA  | 5608.355  | 8722.832  | 14526.439 | 19739.246 |
| GAPDH          | 18476.418 | 18811.167 | 17892.924 | 23830.995 |

**Table S5.** The densitometric analysis of Western blot in Figure 4D (right).

|                | 0 ng/mL   | 1 ng/mL   | 2 ng/mL   | 5 ng/mL   |
|----------------|-----------|-----------|-----------|-----------|
| TGF- $\beta$ 1 |           |           |           |           |
| Fibronectin    | 11710.589 | 22382.388 | 24234.338 | 32300.217 |
| Collagen (I)   | 11916.196 | 20543.246 | 26214.246 | 28894.075 |
| Vimentin       | 4756.092  | 9247.054  | 17667.711 | 17860.631 |

|               |           |           |           |           |
|---------------|-----------|-----------|-----------|-----------|
| $\alpha$ -SMA | 12401.418 | 17188.288 | 20568.995 | 26169.238 |
| GAPDH         | 21518.024 | 21655.489 | 20709.388 | 24849.267 |
| Fibronectin   | 13220.974 | 25971.803 | 24222.267 | 24353.196 |
| Collagen (I)  | 8974.669  | 19452.631 | 20055.56  | 25212.459 |
| Vimentin      | 19834.024 | 22918.066 | 24067.874 | 33848.966 |
| $\alpha$ -SMA | 7738.418  | 13750.874 | 20451.752 | 27348.995 |
| GAPDH         | 13715.376 | 14030.861 | 15552.64  | 16507.841 |
| Fibronectin   | 10969.66  | 24885.874 | 22621.752 | 28116.652 |
| Collagen (I)  | 6813.82   | 8216.882  | 10892.338 | 15425.075 |
| Vimentin      | 12633.539 | 19867.681 | 25806.439 | 30257.368 |
| $\alpha$ -SMA | 8820.69   | 15331.016 | 20137.673 | 28444.108 |
| GAPDH         | 20180.296 | 20891.69  | 17375.761 | 17380.66  |

**Table S6.** The densitometric analysis of Western blot in Figure 4D.

|               | Control   | TGF- $\beta$ 1 | TGF- $\beta$ 1+miR-NC | TGF- $\beta$ 1+miR-542-5p |
|---------------|-----------|----------------|-----------------------|---------------------------|
| Fibronectin   | 6041.054  | 18123.56       | 15634.61              | 9028.539                  |
| Collagen (I)  | 3458.447  | 8367.196       | 10911.167             | 3925.569                  |
| Vimentin      | 6847.205  | 12184.619      | 11054.276             | 3324.033                  |
| $\alpha$ -SMA | 5389.439  | 11454.489      | 14401.974             | 4088.569                  |
| GAPDH         | 16063.874 | 19876.56       | 19336.439             | 20538.146                 |
| Fibronectin   | 8380.125  | 14220.924      | 12469.095             | 9617.347                  |
| Collagen (I)  | 6954.054  | 10742.217      | 10042.823             | 5071.368                  |
| Vimentin      | 4110.033  | 9784.761       | 11291.61              | 6222.296                  |
| $\alpha$ -SMA | 3507.569  | 7423.569       | 7716.811              | 2811.669                  |
| GAPDH         | 14540.054 | 13035.196      | 14851.61              | 15369.075                 |
| Fibronectin   | 3704.841  | 10855.882      | 11247.439             | 6215.296                  |
| Collagen (I)  | 3785.66   | 9764.146       | 8208.903              | 4719.388                  |
| Vimentin      | 5761.548  | 10700.832      | 12703.539             | 7347.882                  |
| $\alpha$ -SMA | 4862.083  | 12862.004      | 14480.246             | 7451.347                  |
| GAPDH         | 17386.782 | 18929.196      | 15333.347             | 16188.832                 |

**Table S7.** The densitometric analysis of Western blot in Figure 5D.

|       | Control   | TGF- $\beta$ 1 | TGF- $\beta$ 1+miR-NC | TGF- $\beta$ 1+miR-542-5p |
|-------|-----------|----------------|-----------------------|---------------------------|
| ITGA6 | 11234.317 | 21810.459      | 18426.045             | 12304.267                 |
| GAPDH | 21187.146 | 25129.61       | 19714.075             | 22688.317                 |
| ITGA6 | 10623.234 | 22281.924      | 26306.388             | 16969.711                 |
| GAPDH | 34728.631 | 25171.095      | 30233.024             | 29562.075                 |
| ITGA6 | 14965.075 | 26859.731      | 24830.075             | 17678.054                 |

|       |           |           |           |           |
|-------|-----------|-----------|-----------|-----------|
| GAPDH | 19286.468 | 26284.439 | 22556.347 | 18728.811 |
|-------|-----------|-----------|-----------|-----------|

**Table S8.** The densitometric analysis of Western blot in Figure 7B.

|               | Control   | TGF- $\beta$ 1 | TGF- $\beta$ 1+vector | TGF- $\beta$ 1+Itga6 |
|---------------|-----------|----------------|-----------------------|----------------------|
| ITGA6         | 3459.184  | 24565.146      | 23980.167             | 4466.447             |
| Fibronectin   | 10087.397 | 14231.196      | 19859.782             | 13022.439            |
| Collagen (I)  | 7292.933  | 10916.095      | 12324.024             | 8446.539             |
| Vimentin      | 12255.782 | 16785.66       | 15861.832             | 10446.175            |
| $\alpha$ -SMA | 7780.539  | 25189.773      | 19874.652             | 10626.539            |
| GAPDH         | 17493.589 | 16012.903      | 18628.489             | 19329.347            |
| ITGA6         | 5002.083  | 18786.125      | 10543.024             | 2473.577             |
| Fibronectin   | 8074.69   | 12016.255      | 10995.477             | 7684.134             |
| Collagen (I)  | 19883.61  | 27995.631      | 28262.874             | 20635.903            |
| Vimentin      | 7741.225  | 15627.51       | 13569.995             | 7963.811             |
| $\alpha$ -SMA | 21993.276 | 32298.995      | 28906.995             | 14950.134            |
| GAPDH         | 7193.054  | 5787.811       | 5885.518              | 5661.811             |
| ITGA6         | 5576.154  | 20523.075      | 25679.933             | 6026.125             |
| Fibronectin   | 5867.983  | 11031.347      | 12005.539             | 9892.225             |
| Collagen (I)  | 8567.368  | 21616.459      | 13982.631             | 5581.175             |
| Vimentin      | 4488.861  | 13579.489      | 13041.882             | 9457.711             |
| $\alpha$ -SMA | 8173.782  | 18977.054      | 16684.539             | 4264.397             |
| GAPDH         | 11170.861 | 11642.397      | 11424.104             | 14109.64             |

**Table S9.** The densitometric analysis of Western blot in Figure 7C.

|        | Control   | TGF- $\beta$ 1 | TGF- $\beta$ 1+vector | TGF- $\beta$ 1+Itga6 |
|--------|-----------|----------------|-----------------------|----------------------|
| P-FAK  | 5111.61   | 15988.581      | 17140.238             | 7445.773             |
| FAK    | 23464.539 | 24637.711      | 27502.296             | 20014.267            |
| P-PI3K | 25217.459 | 35205.995      | 27948.924             | 12081.066            |
| PI3K   | 18547.267 | 21237.924      | 25066.439             | 25940.924            |
| P-AKT  | 2882.284  | 16196.146      | 21233.823             | 8383.803             |
| AKT    | 19858.983 | 18204.74       | 21116.953             | 16844.104            |
| GAPDH  | 25695.823 | 20105.903      | 21709.368             | 20548.731            |
| P-FAK  | 17453.539 | 24738.095      | 25400.924             | 12201.054            |
| FAK    | 18555.539 | 24694.388      | 28113.217             | 32464.51             |
| P-PI3K | 10997.267 | 14956.167      | 15105.853             | 9890.61              |
| PI3K   | 21015.731 | 21172.146      | 25745.782             | 30942.681            |
| P-AKT  | 3730.083  | 8306.74        | 6183.326              | 2870.134             |
| AKT    | 17407.468 | 17243.004      | 14419.497             | 16014.882            |
| GAPDH  | 20614.983 | 16533.711      | 17892.196             | 18687.64             |
| P-FAK  | 7579.61   | 14298.924      | 13813.924             | 4026.903             |
| FAK    | 16962.024 | 17465.024      | 17977.296             | 19534.903            |
| P-PI3K | 10906.823 | 20726.288      | 15952.874             | 5534.589             |

|       |           |           |           |           |
|-------|-----------|-----------|-----------|-----------|
| PI3K  | 11201.761 | 12579.054 | 12988.933 | 11164.64  |
| P-AKT | 4099.042  | 16416.711 | 10416.861 | 3514.234  |
| AKT   | 18819.761 | 15662.669 | 17130.841 | 19418.64  |
| GAPDH | 24465.075 | 29933.054 | 31601.004 | 28374.439 |

**Table S10.** The densitometric analysis of Western blot in Figure 7D.

|               | Control   | TGF- $\beta$ 1 | TGF- $\beta$ 1+miR-<br>R-NC | TGF- $\beta$ 1+miR-<br>542-5p | TGF- $\beta$ 1+miR-5<br>42-5p+vector | TGF- $\beta$ 1+miR-5<br>42-5p+ITGA6 |
|---------------|-----------|----------------|-----------------------------|-------------------------------|--------------------------------------|-------------------------------------|
| ITGA6         | 6149.882  | 14130.681      | 10156.861                   | 4027.912                      | 4135.912                             | 10995.933                           |
| Fibronectin   | 14371.276 | 23246.468      | 24871.225                   | 15446.64                      | 15080.64                             | 24863.953                           |
| Collagen (I)  | 13772.225 | 18059.79       | 18211.962                   | 12868.426                     | 10987.518                            | 15458.104                           |
| Vimentin      | 7303.711  | 14338.539      | 12289.225                   | 8811.933                      | 6515.882                             | 12181.953                           |
| $\alpha$ -SMA | 10162.933 | 14826.083      | 13241.74                    | 8418.74                       | 9284.154                             | 15539.882                           |
| GAPDH         | 19924.711 | 18704.962      | 17709.397                   | 17575.154                     | 18440.497                            | 17330.075                           |
| ITGA6         | 5820.033  | 14278.004      | 11493.711                   | 3767.548                      | 3219.912                             | 14255.731                           |
| Fibronectin   | 7232.175  | 18034.296      | 16674.711                   | 7743.397                      | 6635.397                             | 9582.589                            |
| Collagen (I)  | 15881.569 | 25653.811      | 25627.296                   | 13477.225                     | 12794.711                            | 22021.853                           |
| Vimentin      | 8474.426  | 13056.326      | 9354.983                    | 4281.79                       | 6084.74                              | 13111.64                            |
| $\alpha$ -SMA | 4864.74   | 17125.024      | 14544.347                   | 3864.134                      | 3110.234                             | 11897.054                           |
| GAPDH         | 15761.317 | 16076.033      | 15612.125                   | 15004.418                     | 16688.811                            | 16843.497                           |
| ITGA6         | 4411.234  | 13434.296      | 17564.882                   | 5809.276                      | 5098.326                             | 14475.933                           |
| Fibronectin   | 13913.903 | 20783.296      | 17031.296                   | 10385.619                     | 9817.69                              | 14640.296                           |
| Collagen (I)  | 13952.347 | 28488.953      | 25025.468                   | 17897.882                     | 16825.347                            | 27646.054                           |
| Vimentin      | 9876.74   | 13749.569      | 14985.154                   | 9776.912                      | 6380.991                             | 18924.66                            |
| $\alpha$ -SMA | 4068.255  | 10755.953      | 10591.196                   | 2266.598                      | 2045.406                             | 12819.957                           |
| GAPDH         | 10906.104 | 11828.912      | 10265.619                   | 10900.69                      | 11350.69                             | 12557.681                           |
