# Supplementary material for: miR-542-5p Attenuates Fibroblast Activation by Targeting Integrin α6 in Silica-Induced Pulmonary Fibrosis
Source: MDPI journal article supplement (doi:10.3390/ijms19123717), 2018-11-22
Supplement: s1 [file s1]

## Supplementary Materials and Methods

### *Cell culture*

The human embryonic lung fibroblasts (MRC-5) were purchased from the American Type Culture Collection (ATCC, Manassas, VA, USA) and maintained in the Minimum Essential Medium containing 10% fetal calf serum, 100 U/ml penicillin and 100  $\mu$ g/ml streptomycin. MRC-5 cells were cultured in a humidified atmosphere containing 5% CO<sub>2</sub> at 37 °C.

### *Masson-trichrome staining*

Mouse lung tissues were collected and fixed as described before. Masson-trichrome staining was used to observe the collagen deposition under a slice scanner. Five microscopic fields were randomly selected and the representative parts were shown.

## Supplementary results

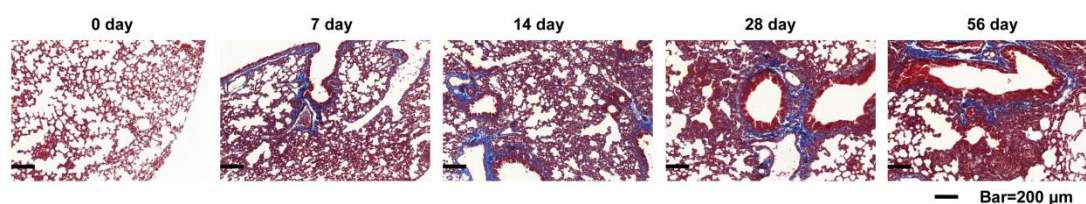

**Figure S1.** Masson-trichrome staining of representative lung sections ( $n = 3$ ) from each group of mice treated with silica for different times (0, 7, 14, 28 and 56 days). Increased collagen (blue) could be observed after silica treatment.

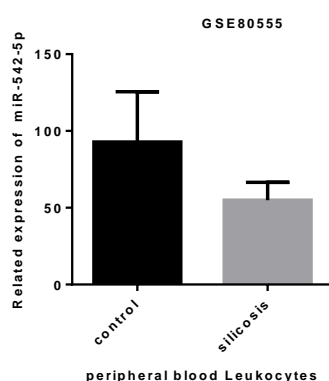

**Figure S2.** Relative RNA level of miR-542-5p in peripheral blood leukocytes from silicosis patients ( $n = 3$  per group) based on the microRNA microarray dataset (GSE80555) downloaded from the Gene Expression Omnibus (GEO) database.

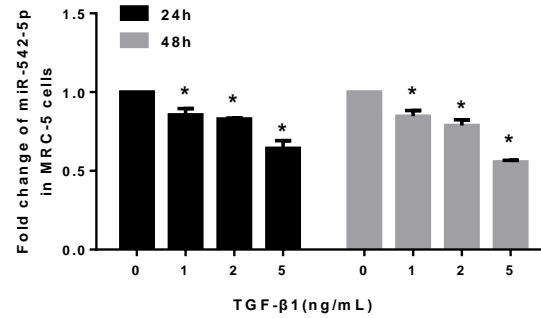

**Figure S3.** The miR-542-5p expression levels were significantly decreased in MRC-5 cells treated with different doses of TGF-β1 (0, 1, 2, 5 ng/mL) for 24 h or 48 h, \*  $p < 0.05$  versus the control group.

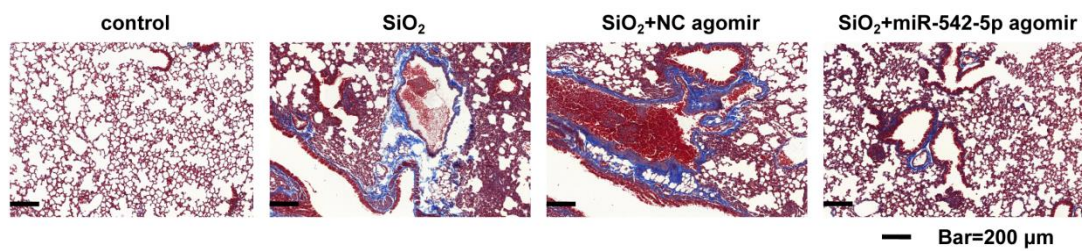

**Figure S4.** Masson-trichrome staining of representative lung sections ( $n = 3$ ) from each group of the prevention model. MiR-542-5p agomir effectively reduces collagen (blue) deposition caused by silica treatment.

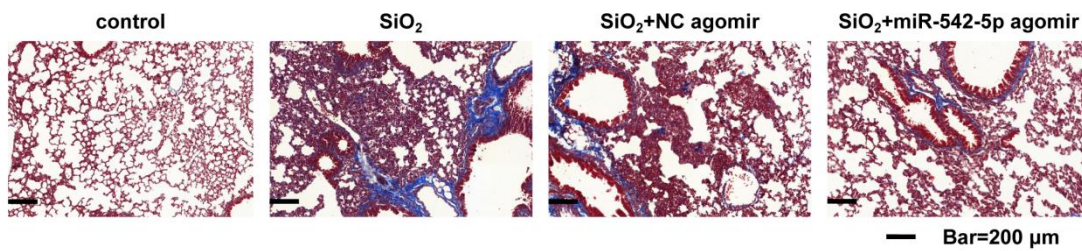

**Figure S5.** Masson-trichrome staining of representative lung sections ( $n = 3$ ) from each group of the treatment model. MiR-542-5p agomir exhibited a certain degree of removing the deposition of collagen (blue).
