# Supplementary figures and images for: miR-542-5p Attenuates Fibroblast Activation by Targeting Integrin α6 in Silica-Induced Pulmonary Fibrosis
Source: MDPI journal article supplement (doi:10.3390/ijms19123717), 2018-11-22

Figure 1C

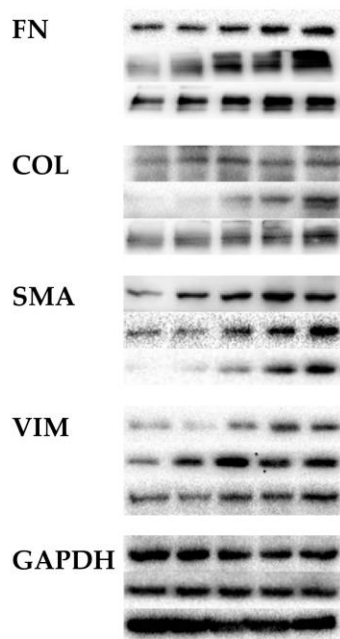

Figure 2D

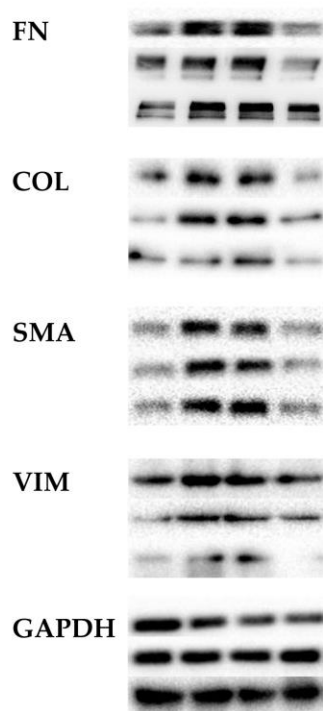

Figure 3D

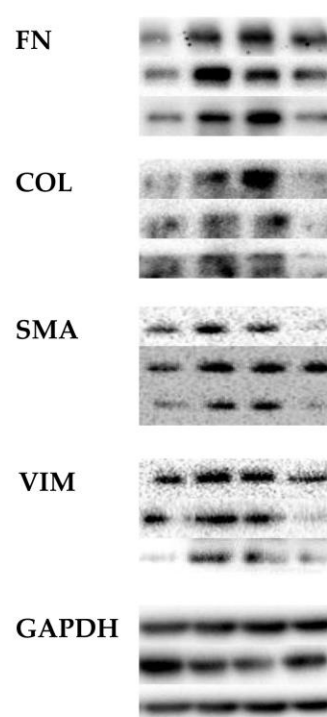

Figure 4A (left)

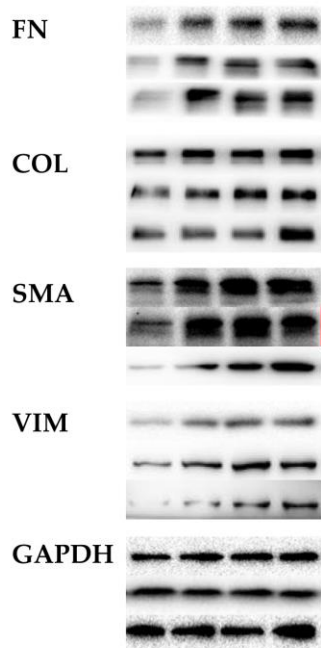

Figure 4A (right)

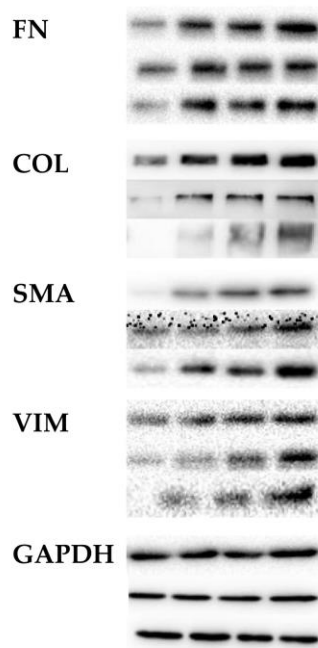

Figure 4D

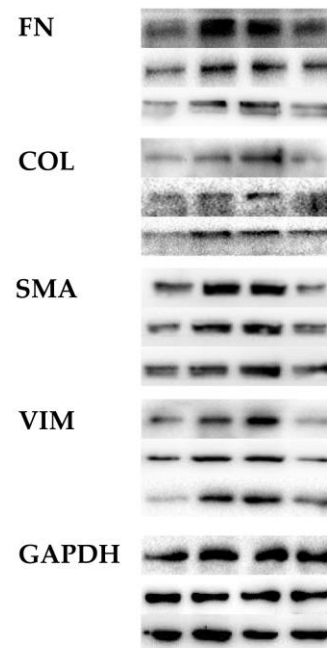

Figure 6D

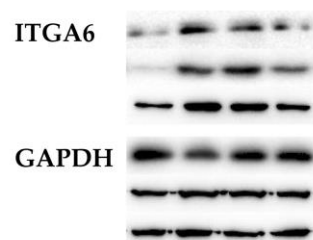

Figure 7B

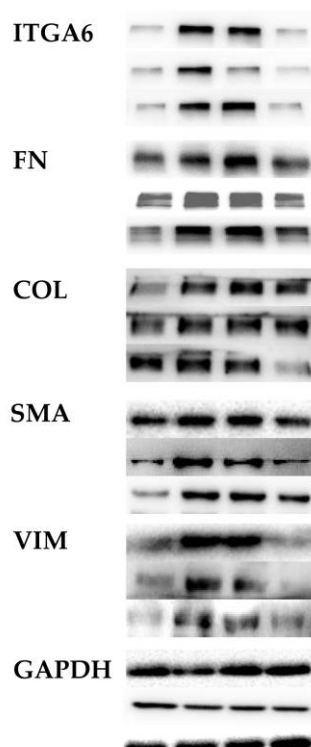

Figure 7C

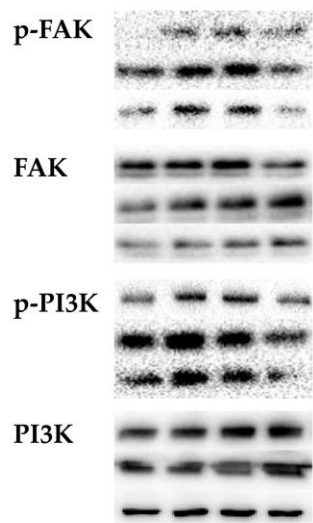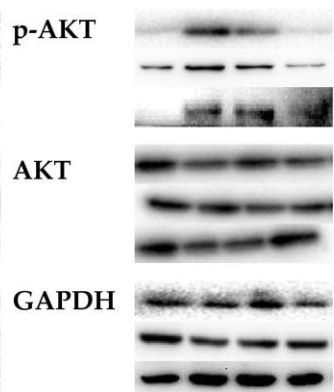

Figure 7D

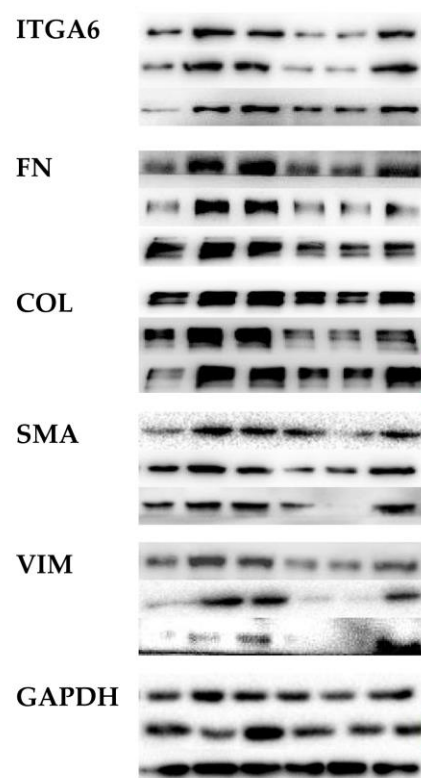

Supplement: s1 [file s1]
